# Supplementary material for: Predictive Power of Auditors’ industry-specific knowledge on Macroeconomic Growth: An Empirical Estimation Utilizing Machine Learning
Source: Research Square preprint supplement (doi:10.21203/rs.3.rs-8283132/v1), 2026-01-19
Supplement: Supplementary file 1 [file 2ff1759700c73b708e331752.docx]

**Highlights**

**1.** **Introduces a new micro-to-macro perspective** by examining how auditors’ industry-specific knowledge—an often-overlooked form of professional expertise—predicts macroeconomic growth.

**2.** **Uses a machine learning approach (Generalized Random Forest)** to estimate heterogeneous causal effects, capturing complex, non-linear relationships between audit knowledge and economic performance.

**3.** **Reveals two key mechanisms** through which auditors’ expertise influences growth: (1) strengthening the capabilities of local audit firms, and (2) enhancing corporate governance through Audit Committees.

**4.** **Shows strong regional, industry, and temporal heterogeneity**, highlighting how institutional contexts shape the economic impact of auditors’ knowledge.

**5.** **Provides policy-relevant insights** for improving audit-market governance, supporting local audit ecosystems, and designing pathways that translate micro-level expertise into sustainable macro-level development.

**6.** **Extends growth theory** by demonstrating how knowledge embedded in the auditing profession contributes to aggregate accounting earnings and broader economic signaling.
